# Supplementary material for: The use of 2D fingerprint methods to support the assessment of structural similarity in orphan drug legislation
Source: Springer Nature journal article supplement (doi:10.1186/1758-2946-6-5), 2014-02-01
Supplement: 13321_2013_494_MOESM2_ESM.pdf [file 13321_2013_494_MOESM2_ESM.pdf]

| Molecule A                                                                         | Molecule B                                                                         | Yes  | No   | Similarity |
|------------------------------------------------------------------------------------|------------------------------------------------------------------------------------|------|------|------------|
| 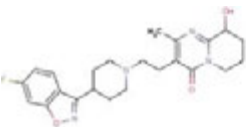    |    | 0.93 | 0.07 | 0.865      |
|   |   | 0.14 | 0.86 | 0.432      |
|  |  | 0.59 | 0.41 | 0.595      |
